# Supplementary material
Source: PubMed Central journal article supplement (PMC4485367)
Supplement: Supp_Fig1.pdf [file Supp_Fig1.pdf]

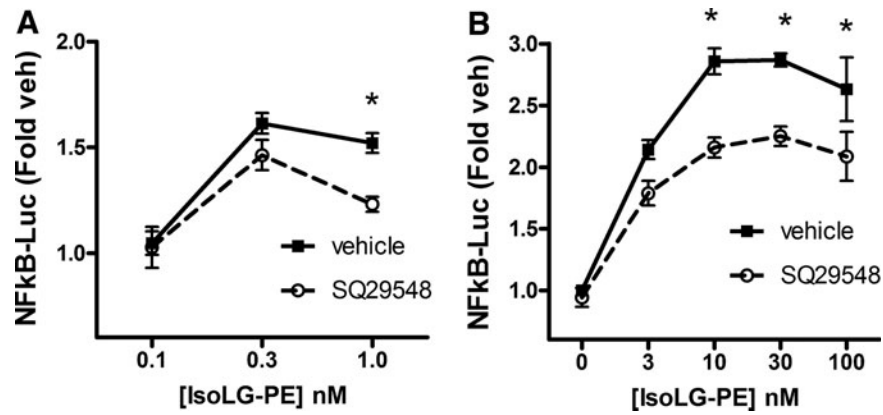

**SUPPLEMENTARY FIG. S1. Thromboxane receptor antagonist SQ29548 modestly inhibits IsoLG-PE induction of NFκB activity.** (A) nfk-b-MDM were preincubated with 1  $\mu$ M SQ29548 or vehicle for 30 min before treatment with 0.1 to 1.0  $\mu$ M IsoLG-PE and the resulting NFκB activity measured by luciferase expression in lysates after 4 h. NFκB activity was normalized to luciferase expression for cells treated with 0.1  $\mu$ M PE (no IsoLG-PE or SQ29548),  $n = 3$  replicate wells per group, two-way ANOVA  $p = 0.0111$  for treatment, and  $p < 0.0001$  for IsoLG-PE concentration,  $*p < 0.05$  Bonferroni multiple comparisons test for vehicle *versus* SQ29548 at the same concentration of IsoLG-PE. (B) RAW264.7 cells transfected with NFκB reporter were preincubated with 1  $\mu$ M SQ29548 or vehicle before treatment with 0 to 100 nM IsoLG-PE for 4 h ( $n = 4-6$  replicate wells per group) and resulting NFκB activity measured by luciferase expression. Two-way ANOVA  $p < 0.0001$  for treatment and for IsoLG-PE concentration,  $*p < 0.05$  Bonferroni multiple comparisons test for vehicle *versus* SQ29548 at the same concentration of IsoLG-PE.
