# Supplementary material
Source: PubMed Central journal article supplement (PMC4485367)
Supplement: Supp_Fig2.pdf [file Supp_Fig2.pdf]

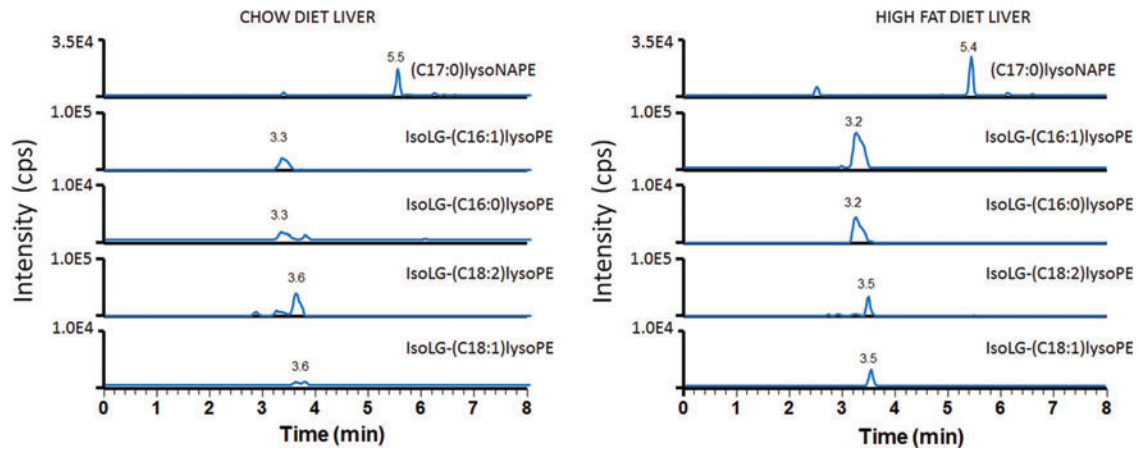

**SUPPLEMENTARY FIG. S2. Representative chromatographs from LC/MS/MS analysis of IsoLG-PE content of liver in mice fed either low-fat chow diet (*left panel*) or high-fat diet (*right panel*).** An internal standard (0.1 nmol C17:0NAPE) was added to each sample, sample homogenized, and phospholipids extracted with 2:1 chloroform/methanol. The organic extracts were then treated with bee venom phospholipase A2 and the resulting IsoLG-lysoPE species measured by LC/MS/MS and quantified using the C17:0lysoNAPE as internal standard.
